# Supplementary material for: Involving young people in sexual health research and service improvement: conceptual analysis of patient and public involvement (PPI) in three projects
Source: PubMed Central journal article supplement (PMC10176375; doi:10.1136/bmjsrh-2022-201611), 2022-10-28
Supplement: bmjsrh-2022-201611supp001.pdf [file bmjsrh-2022-201611supp001.pdf]

## Supplementary Online File

Supplementary Figure 1: Cahill and Dadvand's 7P framework for visioning, planning, enacting and evaluating youth participation\*

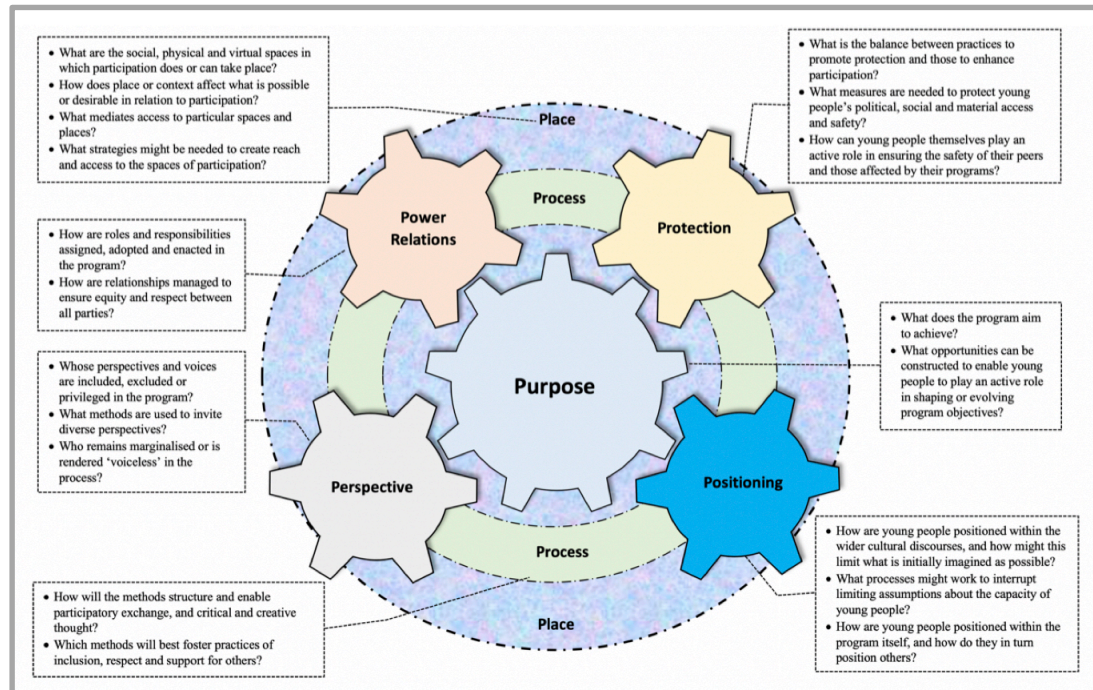

\* Used with author permission
